# Supplementary material for: Multifunctional human serum albumin-modified reduced graphene oxide for targeted photothermal therapy of hepatocellular carcinoma
Source: Royal Society of Chemistry journal article supplement (doi:10.1039/c5ra24785c), 2016-01-01
Supplement: c5ra24785c1.pdf [file c5ra24785c1.pdf]

## Electronic Supplementary Information

### Multifunctional human serum albumin modified reduced graphene oxide for targeted photothermal therapy of hepatocellular carcinoma

Aixian Zheng<sup>a,b</sup>, Da Zhang<sup>a,b</sup>, Ming Wu<sup>a,b</sup>, Huanghao Yang<sup>d</sup>, Xiaolong Liu<sup>\*,a,b</sup>, and Jingfeng Liu<sup>\*,a,b,c</sup>

<sup>a</sup>The United Innovation of Mengchao Hepatobiliary Technology Key Laboratory of Fujian Province, Mengchao Hepatobiliary Hospital of Fujian Medical University, Fuzhou 350025, P. R. China.

<sup>b</sup>The Liver Center of Fujian Province, Fujian Medical University, Fuzhou 350025, P. R. China.

<sup>c</sup>Liver Disease Center, The First Affiliated Hospital of Fujian Medical University, Fuzhou 350005, P. R. China.

<sup>d</sup>The Key Lab of Analysis and Detection Technology for Food Safety of the MOE, College of Chemistry, Fuzhou University, Fuzhou 350108, P. R. China.

\*Corresponding author. Tel: +86-591-83705927; E-mail: xiaoloong.liu@gmail.com, drjingfeng@126.com

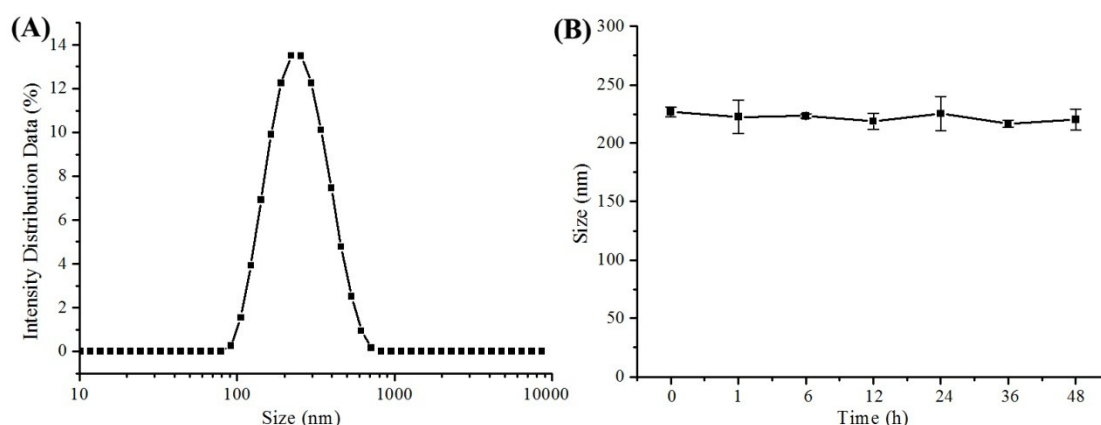

**Fig. S1** Dynamic light scattering (DLS) spectra of GO-HSA (A) and their corresponding size distribution over time (B).

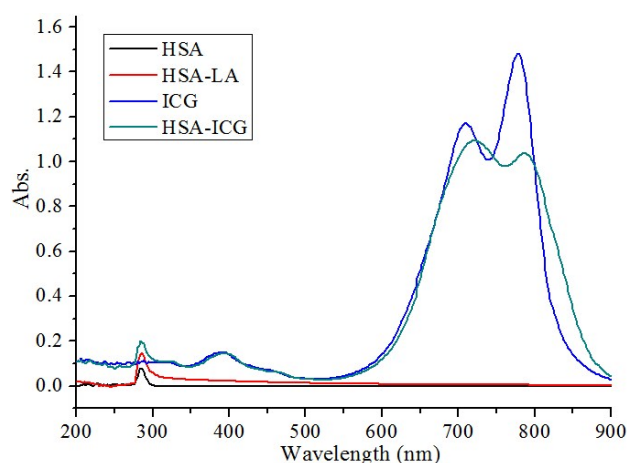

**Fig. S2** The UV-vis-NIR absorption spectra of free ICG, HSA, HSA-ICG and HSA-LA.

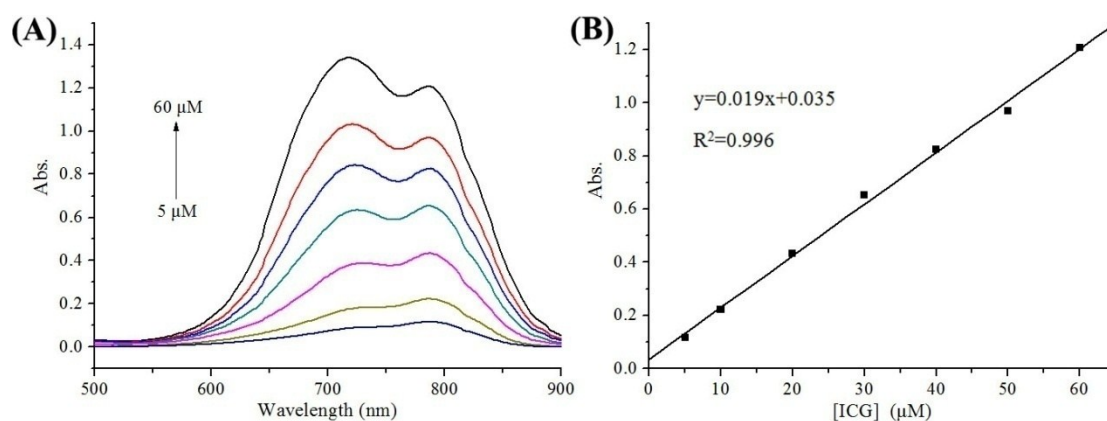

**Fig. S3** (A) The Vis-NIR absorption spectra of different concentrations of ICG in HSA solution; (B) the calibration curve for ICG quantitation.

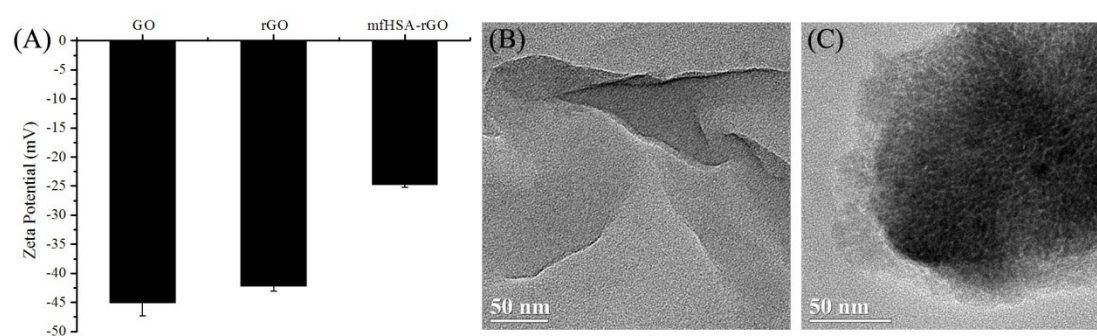

**Fig. S4** (A) Surface zeta potential of GO, rGO and mfHSA-rGO; (B) TEM image of GO; (C) TEM image of mfHSA-rGO.

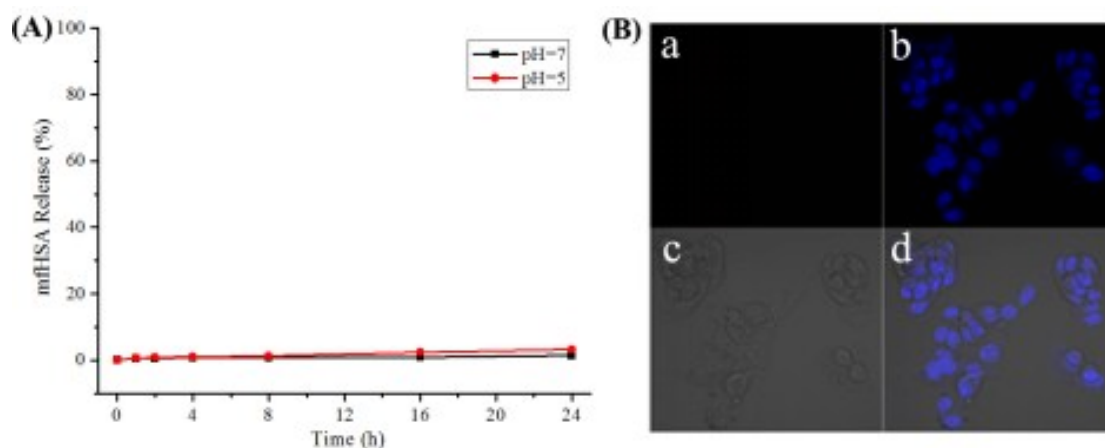

**Fig. S5** (A) The release behaviour of the mfHSA-rGO in buffer (with pH 5 or 7) determined by measuring ICG fluorescence of the supernatant; (B) Confocal microscopy images of mfHSA-rGO treated HepG2 cells. The d images were merged with the Hoechst image (nucleus staining) and cellular morphology.

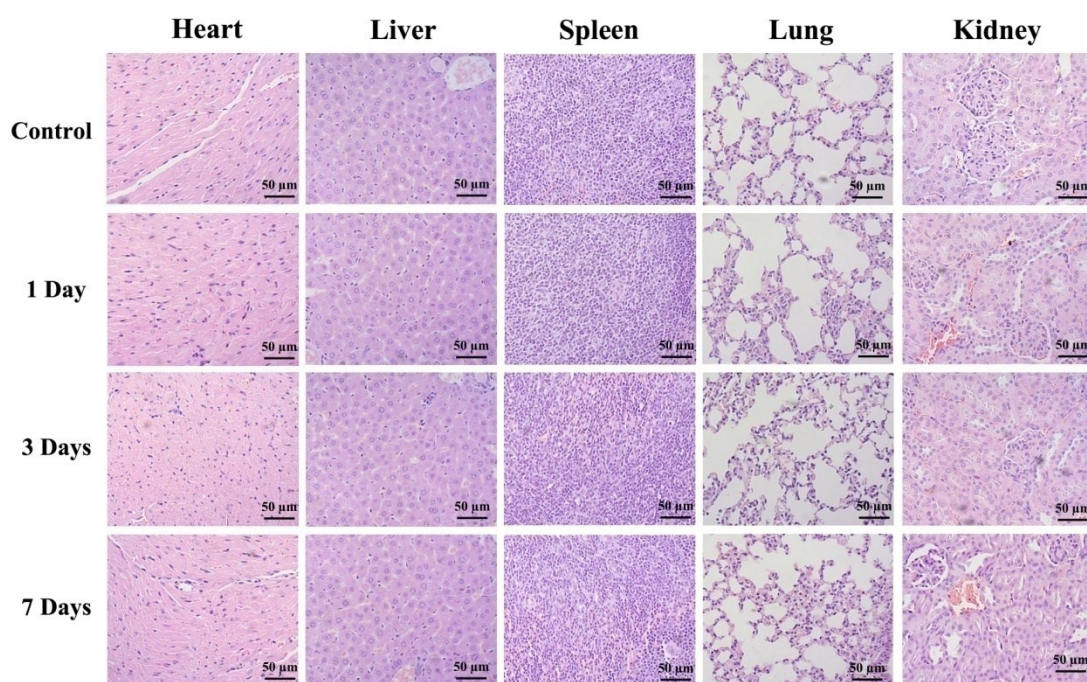

**Fig. S6** Histopathological analysis of the mice injected with 200µg rGO-mfHSA for 1, 3, and 7 days. The mouse injected with 200µL PBS was used as control. The major organs of the mice were isolated and H&E stained. The H&E staining showed no signs of inflammation or deformities.
